# Supplementary material for: Neurobehavioral Effects of Fermented Rice Bran Extract in Zebrafish Larvae Model
Source: MDPI journal article supplement (doi:10.3390/fermentation9050479), 2023-05-16
Supplement: s1 [file s1]

# Supplementary Materials

## Neurobehavioral Effects of Fermented Rice Bran Extract in Zebrafish Larvae Model

Jin Sil Chae <sup>1,2,†</sup>, Seong Soon Kim <sup>1,†</sup>, Kyu-Seok Hwang <sup>1,†</sup>, Hyemin Kan <sup>1</sup>, Jung Yoon Yang <sup>1</sup>,  
Byunghoi Lee <sup>1</sup>, Dae-Seop Shin <sup>1</sup>, Byounghee Park <sup>3</sup> and Myung Ae Bae <sup>1,2,\*</sup>

<sup>1</sup> Bio Platform Technology Research Center, Korea Research Institute of Chemical Technology, Daejeon 34114, Republic of Korea; tlf7556@naver.com (J.S.C.); kimss@krikt.re.kr (S.S.K.); kshwang@krikt.re.kr (K.-S.H.); rgpalsl@gmail.com (H.K.); yjy1608@krikt.re.kr (J.Y.Y.); bnhlee@krikt.re.kr (B.L.); dsshin@krikt.re.kr (D.-S.S.)

<sup>2</sup> Department of Medicinal Chemistry and Pharmacology, University of Science and Technology, Daejeon 34113, Republic of Korea

<sup>3</sup> R&D Center, Raphagen Inc., Seoul 07286, Republic of Korea; park@raphagen.com

\* Correspondence: mbae@krikt.re.kr

† These authors contributed equally on this work.

**Figure S1.** Schematic illustrating the purification of RBF30.

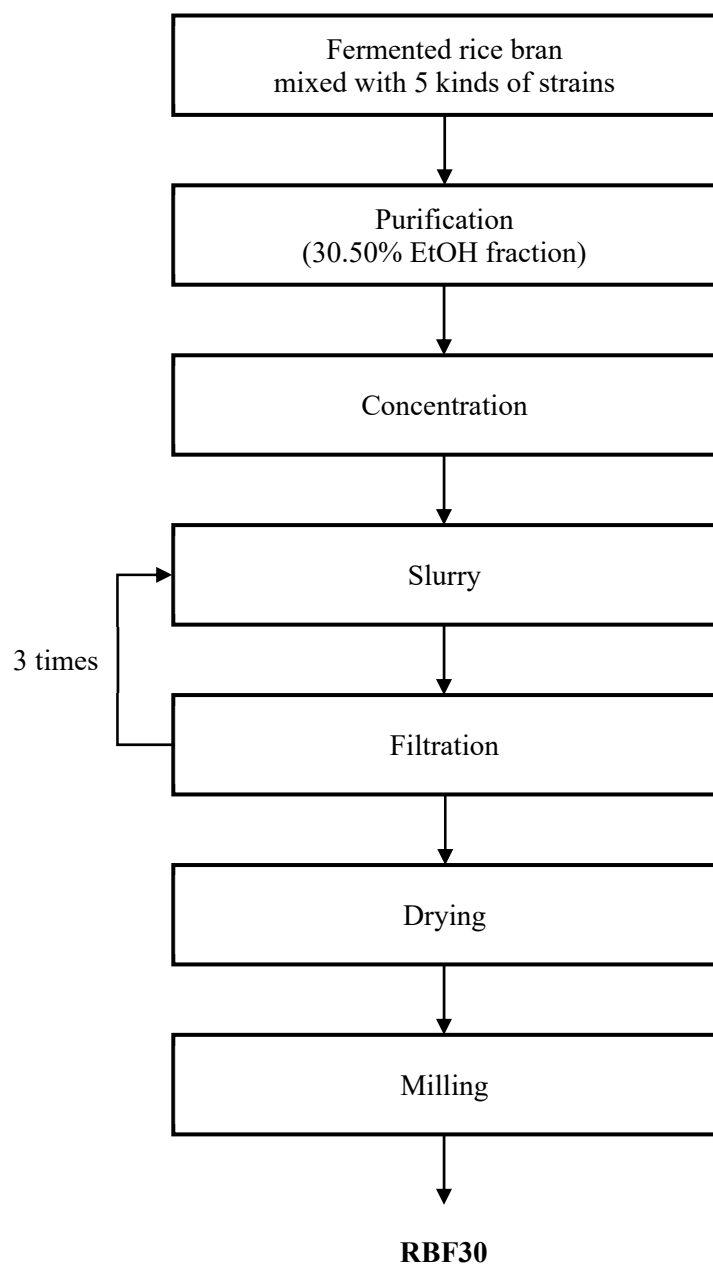

**Figure S2. Behavioral effects of ethanol (EtOH) fractions 0 to 100 % (v/v) of various concentrations of RBF30 in 5 dpf zebrafish larvae. Data was represented as means  $\pm$  standard error of the mean (n=18). Significance was set at  $*p \leq 0.05$ ,  $**p \leq 0.01$ , and  $***p \leq 0.001$  versus control.**

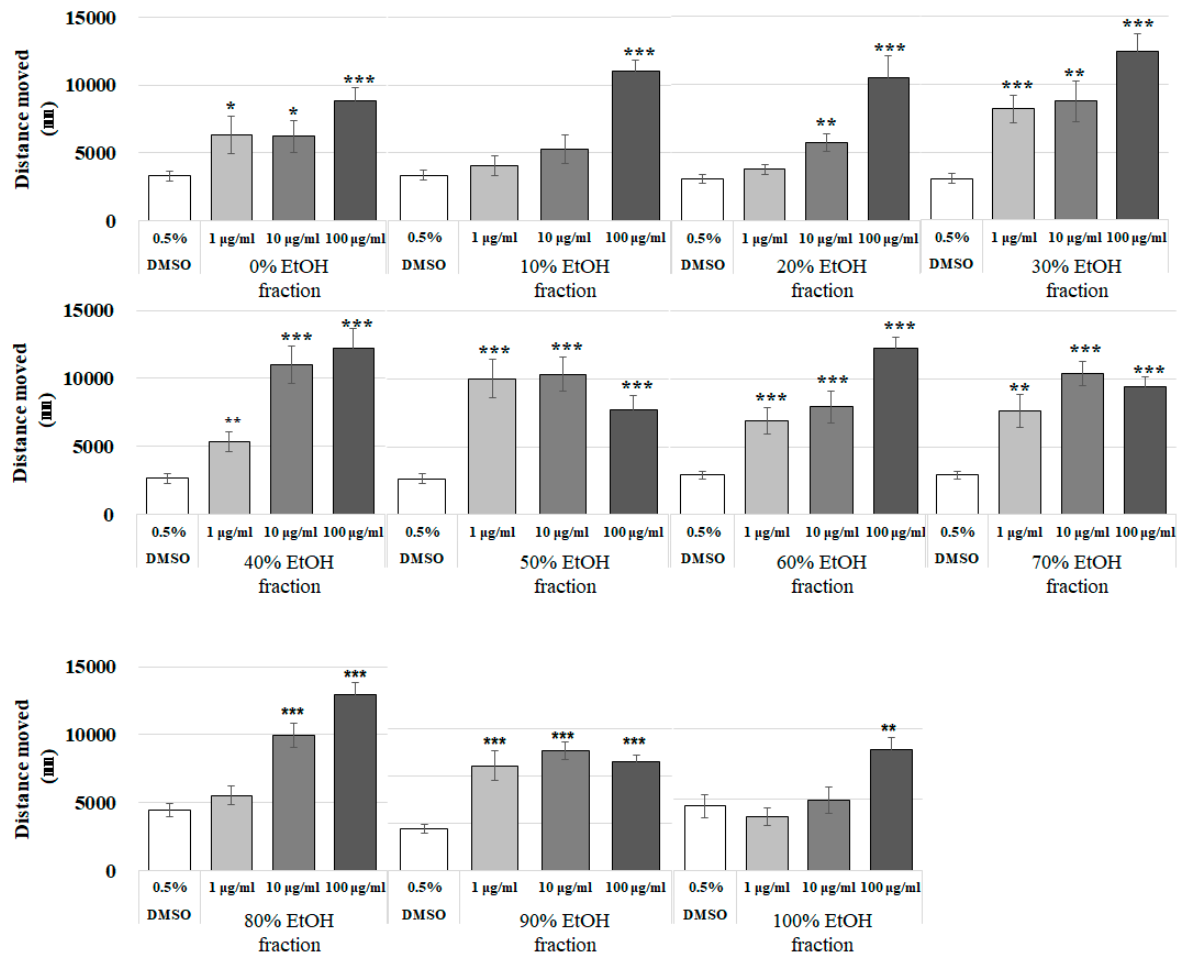

**Figure S3. Larval locomotor activity in 5 dpf zebrafish larvae. Distance moved (percentage of control) of control, pentylenetetrazole (PTZ), modafinil (MDF), and RBF30-treated larvae. Data was represented as means  $\pm$  standard error of the mean (n=18). Significance was set at  $*p \leq 0.05$ ,  $**p \leq 0.01$ , and  $***p \leq 0.001$  versus control.**

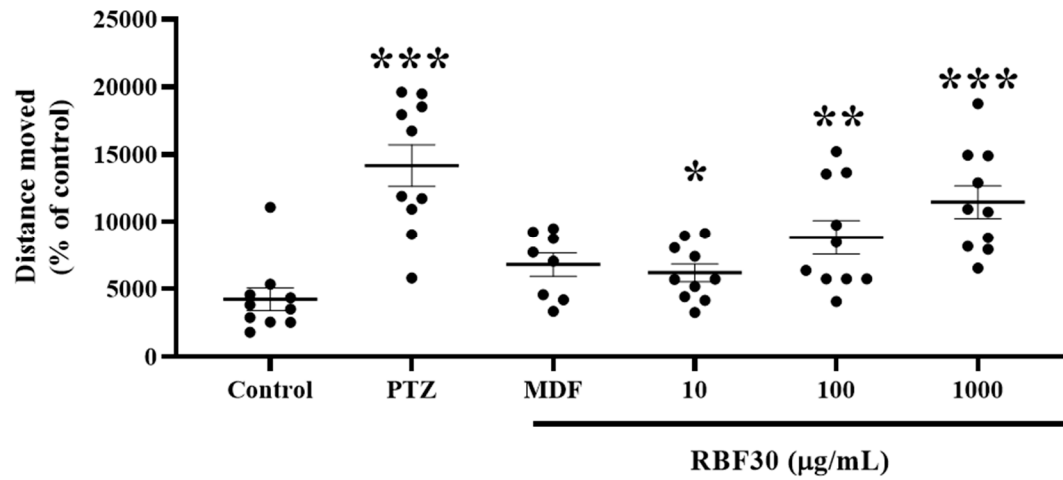

Figure S4. Larval locomotor activity in alternating periods of light and dark after administration of MDF and PTZ. (A and B) Total distance moved under alternating light/dark cycles in each 2-minute period. (C) Distance moved (percentage of control) of control and, MDF or PTZ-treated larvae in each 10-minute light–dark period. Data was represented as means  $\pm$  standard error of the mean (n=8). Significance was set at  $*p \leq 0.05$ ,  $**p \leq 0.01$ , and  $***p \leq 0.001$  versus control.

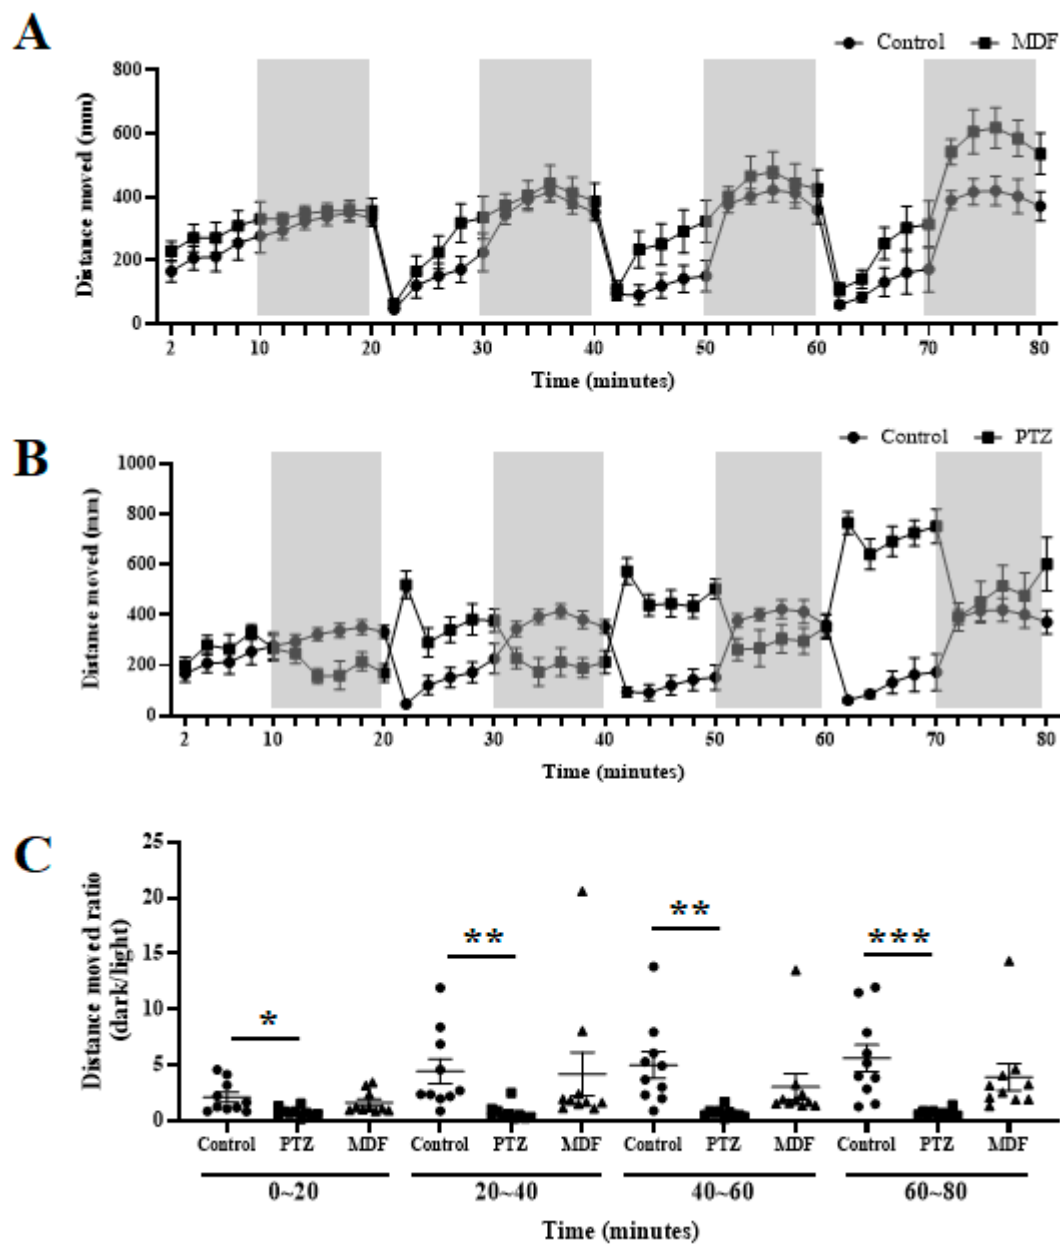

**Figure S5. (A) UV spectrums scan of RB30 and RBF30 at wavelengths from 210 nm to 500 nm. (B and C) Full MS Scan (ESI<sup>+</sup>) of RB30 and RBF30 at m/z 50 to 500. The integral peak was assumed as a niacin ([M+H]<sup>+</sup> 124 ion).**

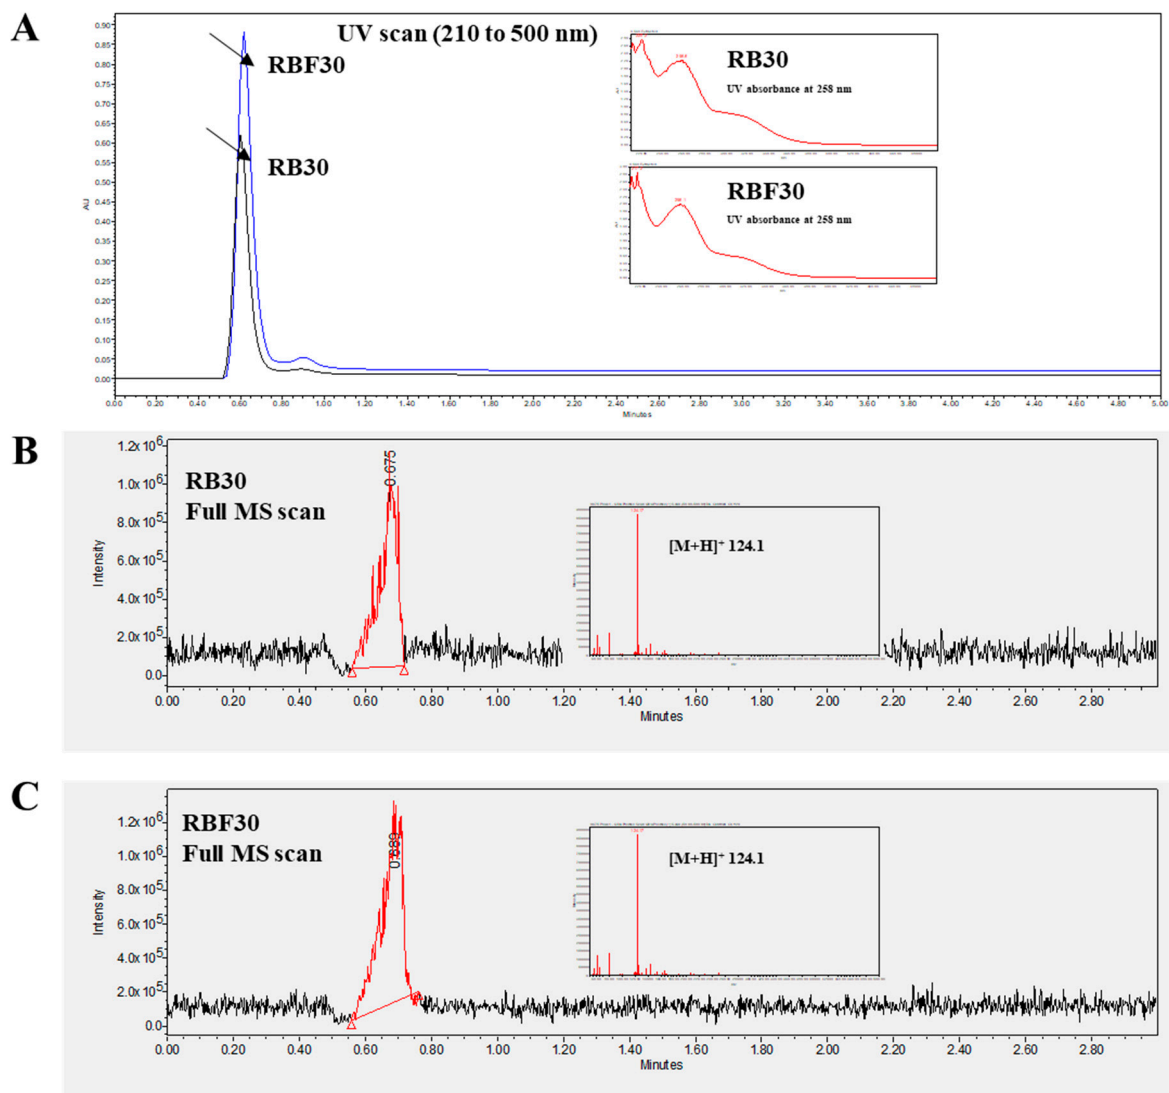

Table S1. Statistical analysis of color preference using two-way Anova (treatment versus color)

| Color  | Treatment         | Mean Diff. | 95.00% CI of diff. | Summary         | Adjusted P Value |
|--------|-------------------|------------|--------------------|-----------------|------------------|
| Blue   | Control vs. PTZ   | 49.83      | 42.90 to 56.76     | ****            | <0.0001          |
|        | Control vs. MDF   | -2.167     | -7.561 to 3.228    | ns <sup>a</sup> | 0.656            |
|        | Control vs. RBF30 | 16.33      | 9.878 to 22.79     | ****            | <0.0001          |
|        | PTZ vs. MDF       | -52        | -58.39 to -45.61   | ****            | <0.0001          |
|        | PTZ vs. RBF30     | -33.5      | -43.32 to -23.68   | ****            | <0.0001          |
|        | MDF vs. RBF30     | 18.5       | 10.48 to 26.52     | ****            | <0.0001          |
| Red    | Control vs. PTZ   | -23.5      | -30.11 to -16.89   | ****            | <0.0001          |
|        | Control vs. MDF   | 3          | -1.440 to 7.440    | ns              | 0.2473           |
|        | Control vs. RBF30 | 0.3333     | -5.153 to 5.820    | ns              | 0.9979           |
|        | PTZ vs. MDF       | 26.5       | 19.82 to 33.18     | ****            | <0.0001          |
|        | PTZ vs. RBF30     | 23.83      | 16.17 to 31.50     | ****            | <0.0001          |
|        | MDF vs. RBF30     | -2.667     | -7.501 to 2.167    | ns              | 0.408            |
| White  | Control vs. PTZ   | 10.83      | 6.481 to 15.19     | ****            | <0.0001          |
|        | Control vs. MDF   | 1.667      | -3.671 to 7.005    | ns              | 0.8012           |
|        | Control vs. RBF30 | 0.8333     | -5.536 to 7.202    | ns              | 0.9805           |
|        | PTZ vs. MDF       | -9.167     | -13.69 to -4.645   | ***             | 0.0002           |
|        | PTZ vs. RBF30     | -10        | -15.45 to -4.553   | ***             | 0.0005           |
|        | MDF vs. RBF30     | -0.8333    | -6.961 to 5.294    | ns              | 0.9782           |
| Yellow | Control vs. PTZ   | -28.5      | -31.89 to -25.11   | ****            | <0.0001          |
|        | Control vs. MDF   | -1.667     | -4.890 to 1.557    | ns              | 0.4618           |
|        | Control vs. RBF30 | -7.333     | -11.05 to -3.617   | ***             | 0.0003           |
|        | PTZ vs. MDF       | 26.83      | 21.95 to 31.72     | ****            | <0.0001          |
|        | PTZ vs. RBF30     | 21.17      | 15.77 to 26.56     | ****            | <0.0001          |
|        | MDF vs. RBF30     | -5.667     | -9.102 to -2.231   | **              | 0.0014           |

<sup>a</sup>NS, not significant

Significance was set at \* $p \leq 0.05$ , \*\* $p \leq 0.01$ , \*\*\* $p \leq 0.001$ , \*\*\*\* $p \leq 0.0001$
